# Supplementary material
Source: publisher figshare collection journal article supplement (https://acs.figshare.com/ndownloader/files/7878562)
Supplement: Supplementary file 1 [file 7878562]

## **Supporting Information:**

### **Chained Iron Microparticles for Directionally Controlled Actuation of Soft Robots**

**Marissa M. Schmauch,<sup>†,‡</sup> Sumeet R. Mishra,<sup>†</sup> Benjamin A. Evans,<sup>||</sup> Orlin D. Velev,<sup>§</sup> and Joseph B. Tracy<sup>\*,†</sup>**

<sup>†</sup>Department of Materials Science and Engineering and <sup>§</sup>Department of Chemical and Biomolecular Engineering, North Carolina State University, Raleigh, North Carolina 27695, United States

<sup>‡</sup>Department of Chemistry and Biochemistry, University of Tulsa, Tulsa, Oklahoma 74104, United States

<sup>||</sup>Department of Physics, Elon University, Elon, NC 27244

\*Email: [jbtracy@ncsu.edu](mailto:jbtracy@ncsu.edu)

### Additional Photographs of Weight Lifting in Applied Magnetic Fields

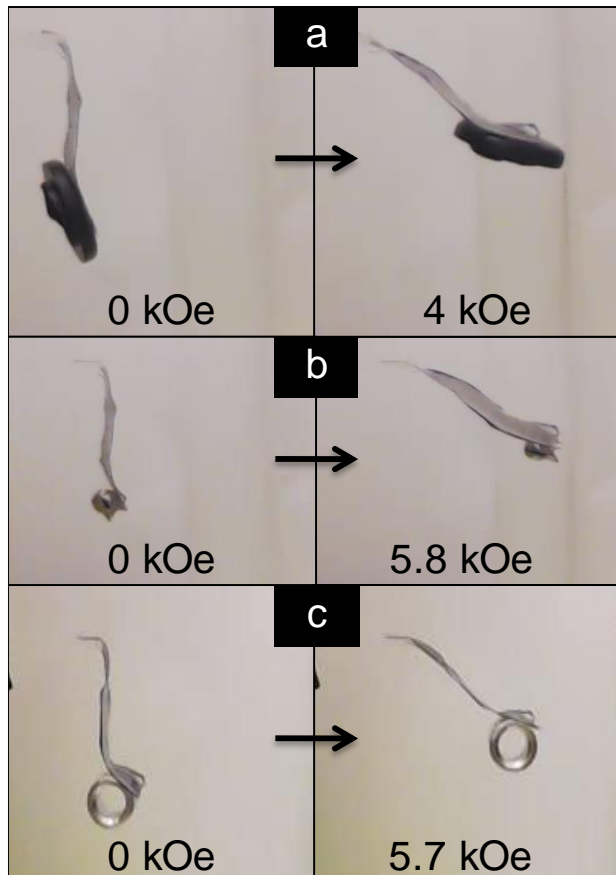

**Figure S1.** Photographs of weight lifting using cantilevers made from strips of composite film ( $l = 26$  mm,  $w = 12$  mm) with MMP chains oriented lengthwise, held fixed on the left end and with weights attached to the right end: (a) a piece of rubber (0.34 g), (b) a piece of lead (0.5 g), and (c) a piece of aluminum (0.52 g). The magnetic field was applied in a horizontal direction. Movie S1 for (c) is included in the Supporting Information.

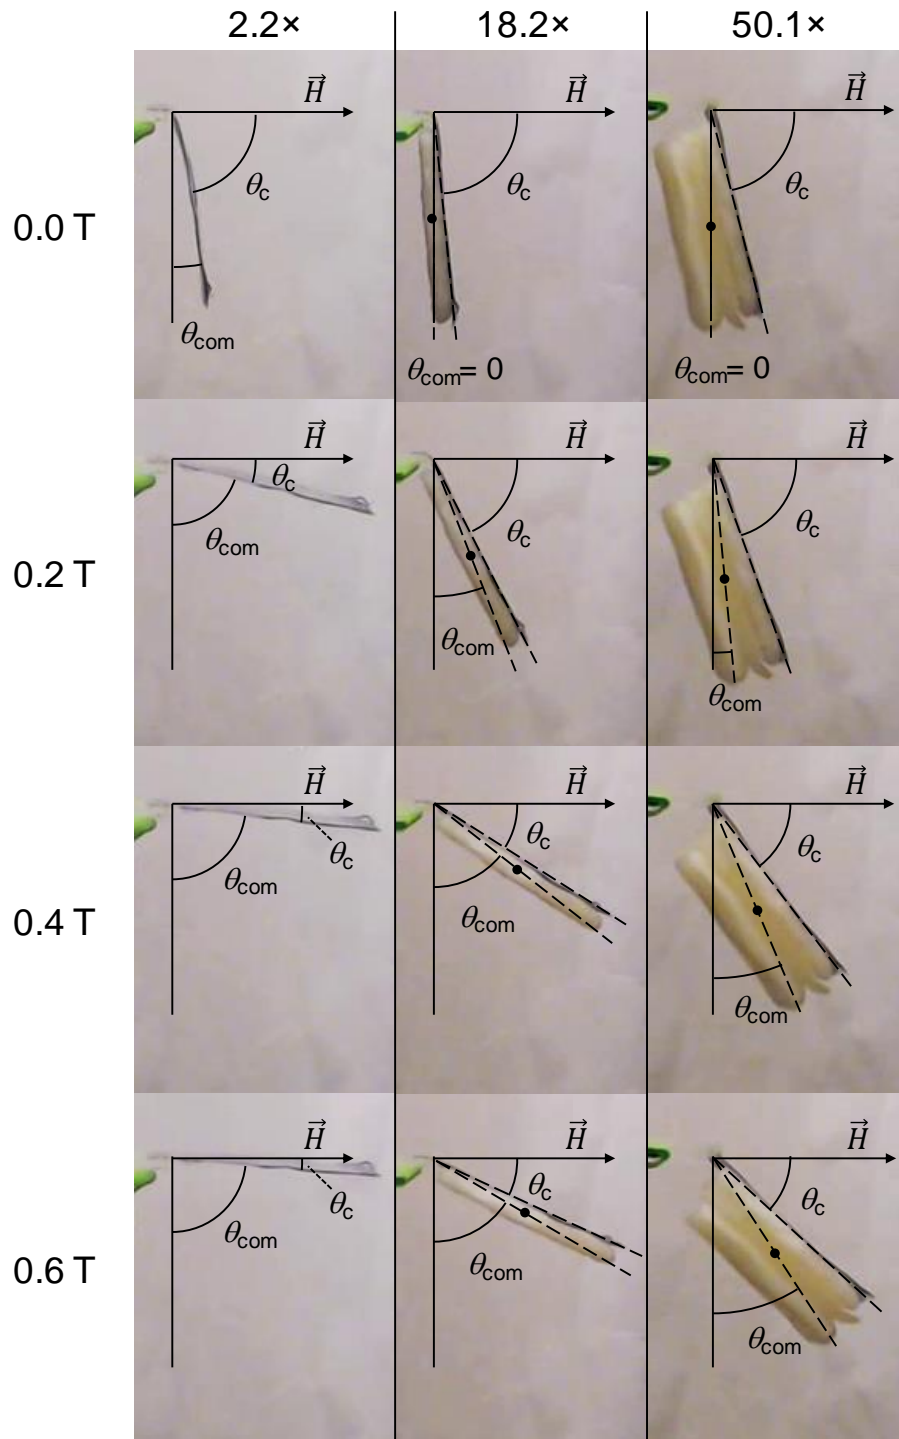

**Figure S2.** Representative images from Parafilm lifting experiments. As the magnitude of the magnetic field increases, the cantilever lifts toward horizontal.  $\theta_c$  represents the angle of the cantilever with respect to the applied horizontal magnetic field, and  $\theta_{com}$  represents the angle of the center of mass of the cantilever-Parafilm system relative to vertical. For weights of 18.2× and 50.1×, the center of mass is below the plane of the cantilever film and is represented in these images by a black dot.
